# Supplementary material for: Polo kinase Cdc5 associates with centromeres to facilitate the removal of centromeric cohesin during mitosis
Source: PubMed Central journal article supplement — Mol Biol Cell. 2016 Jul 15;27(14):2286–300. doi: 10.1091/mbc.E16-01-0004 (PMC4945145; doi:10.1091/mbc.e16-01-0004), 2016-07-15
Supplement: supp_E16-01-0004v1_CombinedSupMats.pdf [file supp_E16-01-0004v1_CombinedSupMats.pdf]

# Supplemental Materials

*Molecular Biology of the Cell*

Mishra et al.

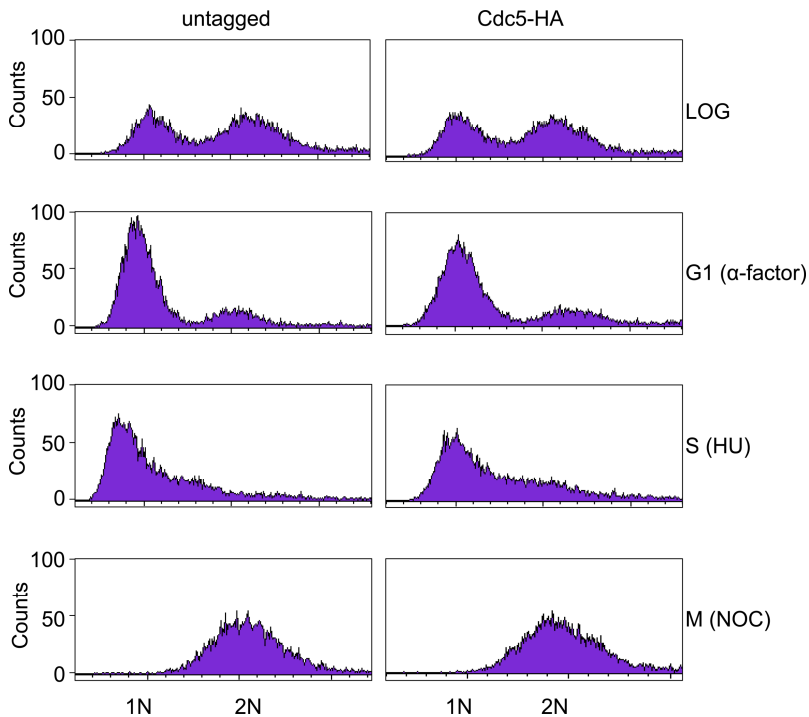

**FIGURE S1:** FACS profile showing cell cycle synchronization of wild type untagged (YMB9263) and Cdc5-HA tagged (YMB9264) strains in logarithmically growing cultures (LOG), G1 ( $\alpha$ -factor treatment), S-phase (HU: hydroxyurea treatment), and M (NOC: nocodazole treatment) stages of the cell cycle.

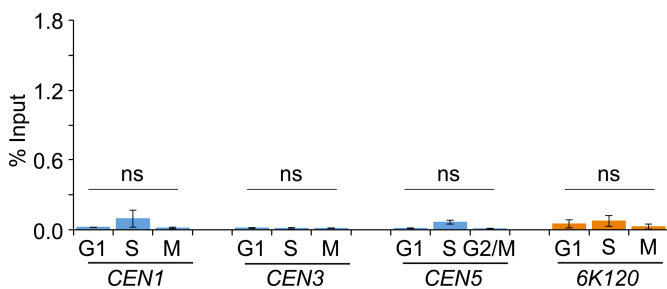

**FIGURE S2:** Control ChIP-qPCR data using an untagged control strain (YMB9263). Strain was grown in synthetic media at 30°C to logarithmic phase and arrested in G1 (cells synchronized with alpha factor), S-phase (cells synchronized with HU), and M (NOC, cells synchronized with nocodazole) stages of the cell cycle. ChIP experiments were performed using  $\alpha$ -HA antibodies. Enrichment at *CEN* (*CEN1*, *CEN3*, and *CEN5*) and negative control region *6K120* was determined by qPCR and is shown as % input. Average from three biological replicates  $\pm$  standard error is shown. ns = statistically not significant, Student's t test.
